# Supplementary material for: The Common Insecticides Cyfluthrin and Chlorpyrifos Alter the Expression of a Subset of Genes with Diverse Functions in Primary Human Astrocytes
Source: Oxford University Press journal article supplement (doi:10.1093/toxsci/kfl046), 2006-06-21

**A**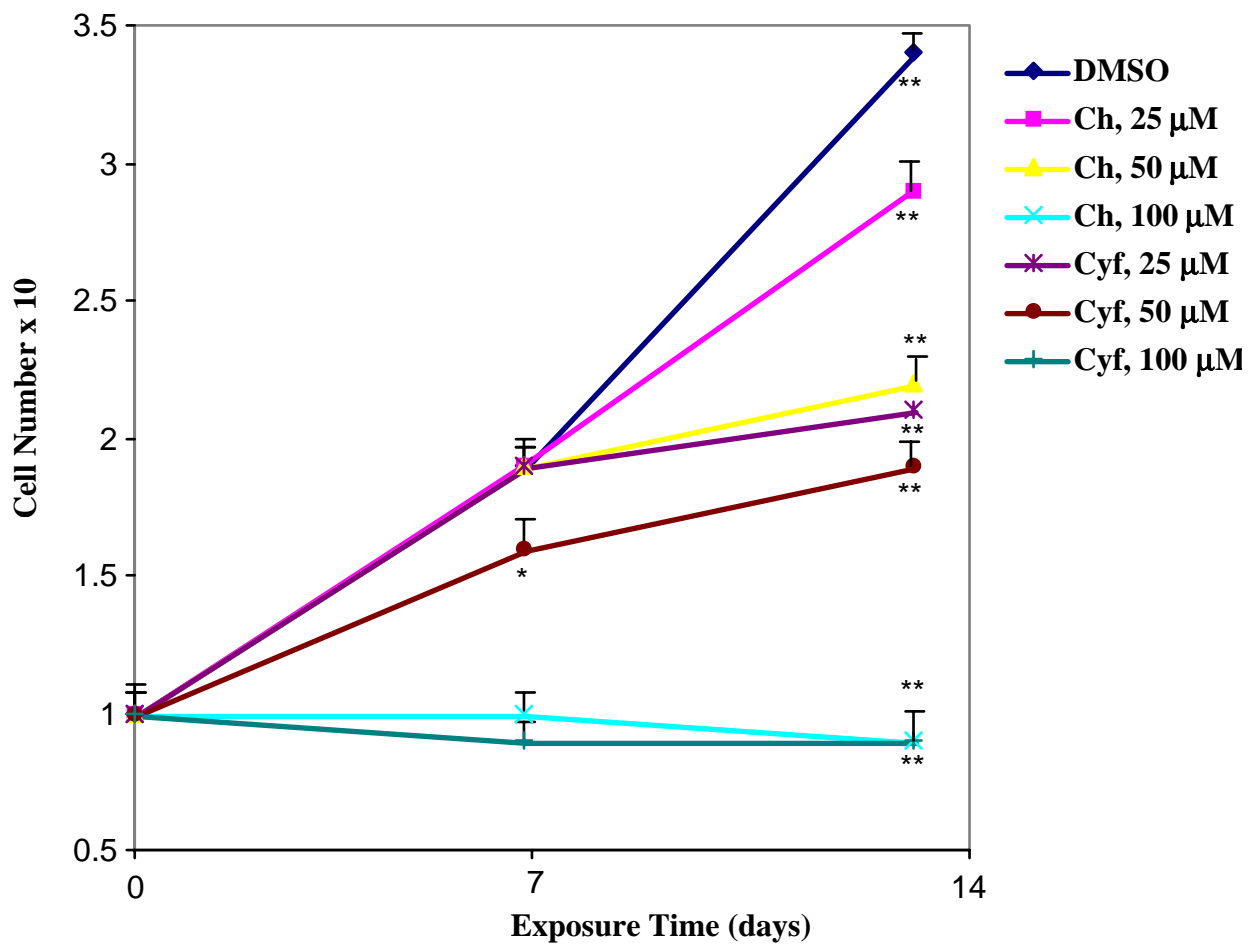

**B**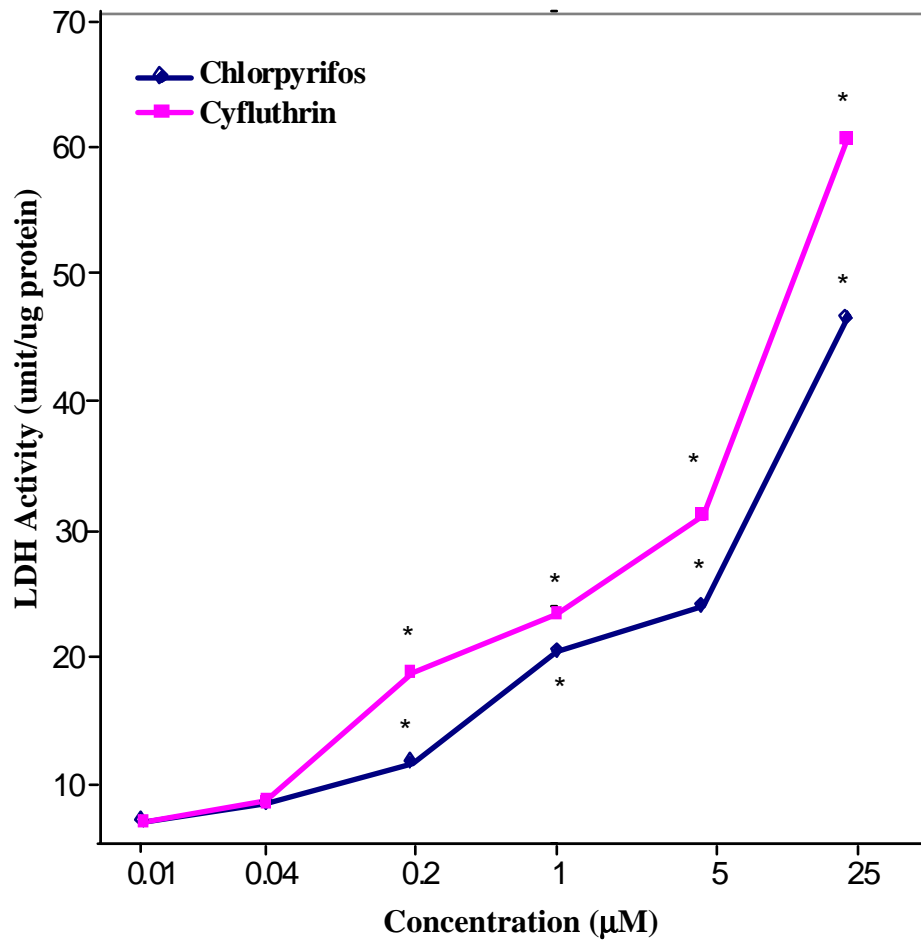

**C**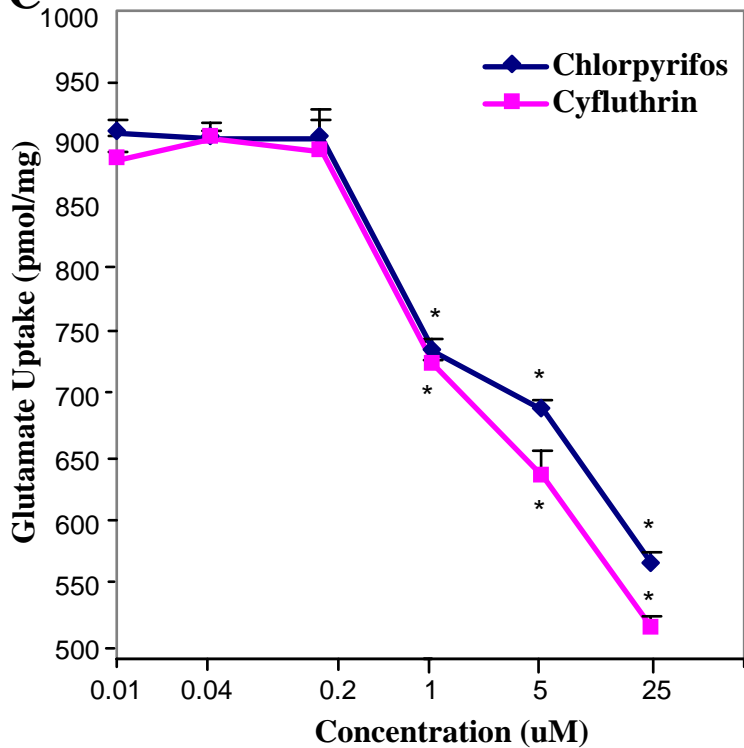

**DAPI**

**TUNEL**

**DMSO**

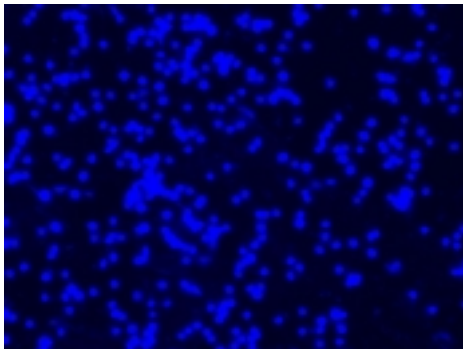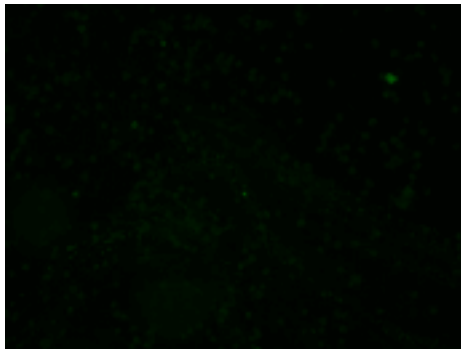

**Ch**

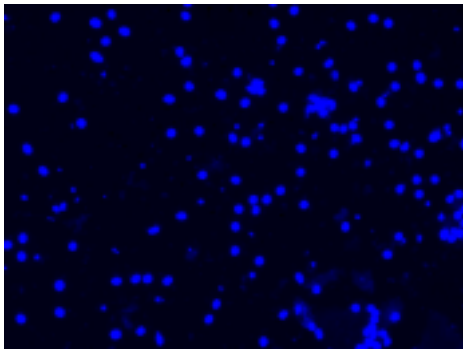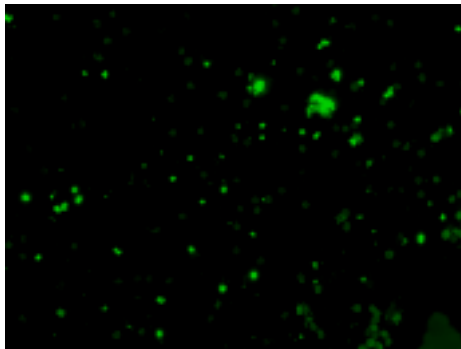

**Cyf**

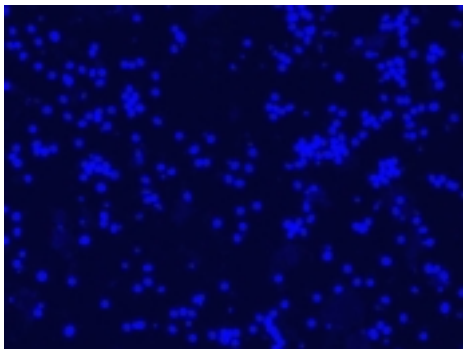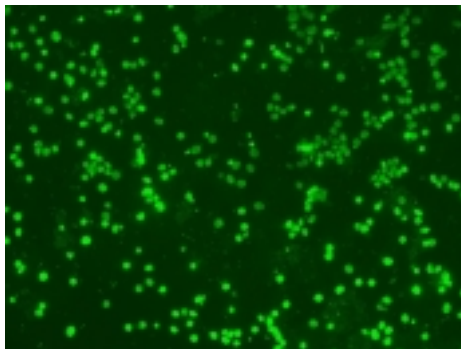

**A****Chlorpyrifos-enhanced transcripts**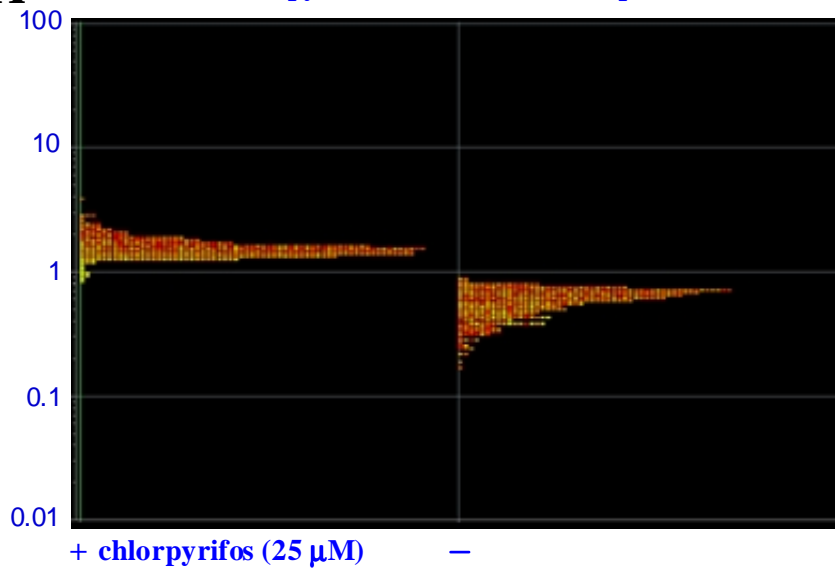**Chlorpyrifos-reduced transcripts**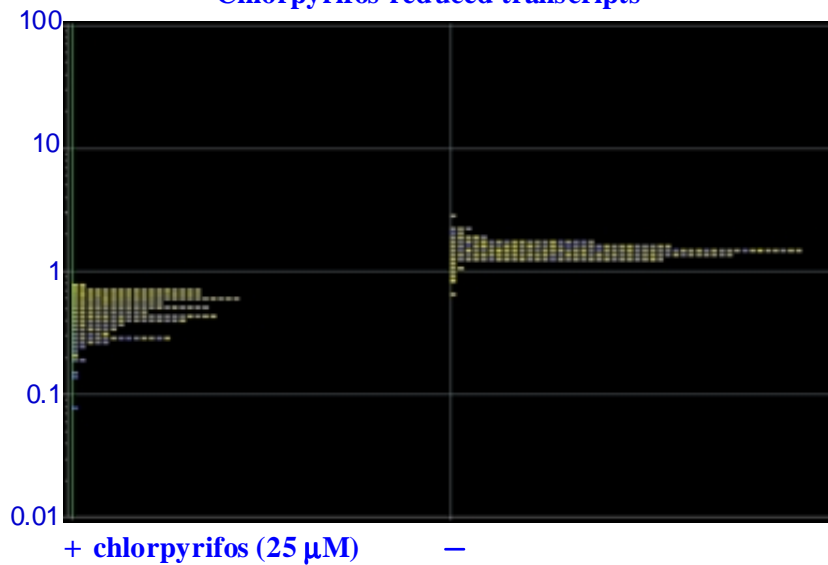

**B****Cyfluthrin-enhanced transcripts**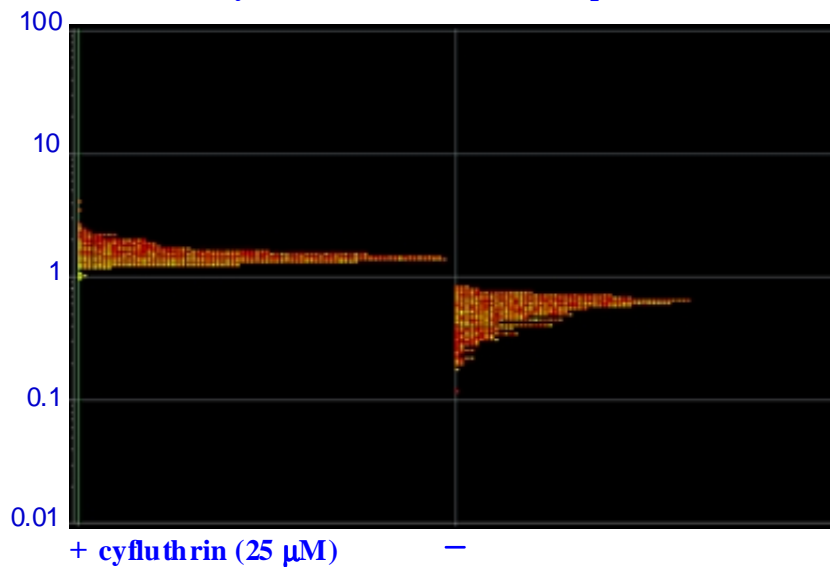**Cyfluthrin-reduced transcripts**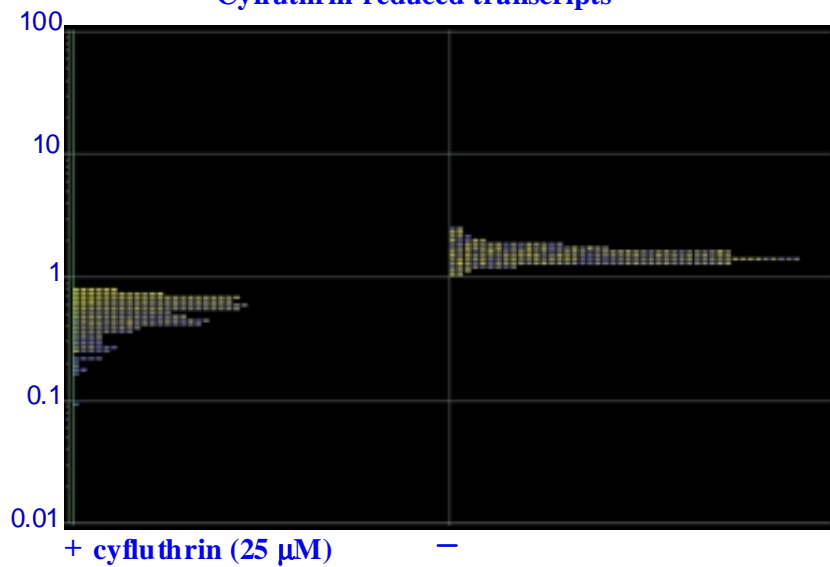

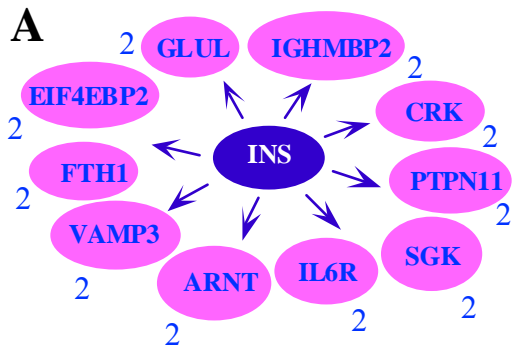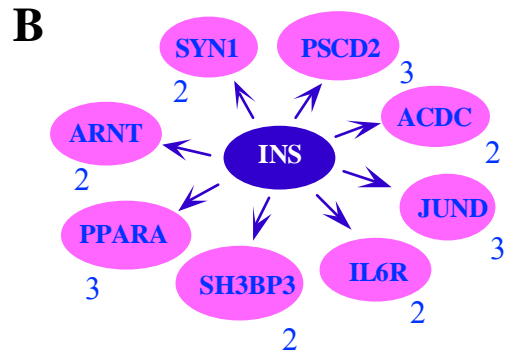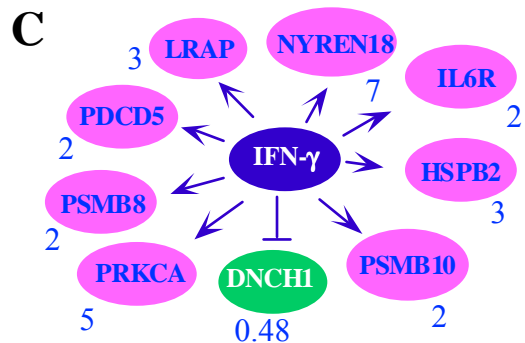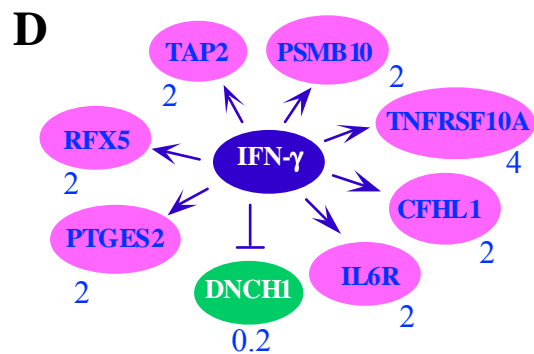

Supplement: kfl046_Supplementary_Data.zip [file kfl046_Supplementary_Data.zip › kfl046supp-figures.pdf]
