# Supplementary material for: The Common Insecticides Cyfluthrin and Chlorpyrifos Alter the Expression of a Subset of Genes with Diverse Functions in Primary Human Astrocytes
Source: Oxford University Press journal article supplement (doi:10.1093/toxsci/kfl046), 2006-06-21
Supplement: kfl046_Supplementary_Data.zip [file kfl046_Supplementary_Data.zip]

Archive with 1 entries (1 files):
- kfl046supp-figures.pdf
